# Supplementary material for: AAV-monoclonal antibody expression protects mice from Ebola virus without impeding the endogenous antibody response to heterologous challenge
Source: PubMed Central journal article supplement — Mol Ther Methods Clin Dev. 2022 Aug 12;26:505–18. doi: 10.1016/j.omtm.2022.08.003 (PMC9436706; doi:10.1016/j.omtm.2022.08.003), 2022-08-12
Supplement: mmc1.pdf [file mmc1.pdf]

**Supplemental information**

**AAV-monoclonal antibody expression protects mice from Ebola virus without impeding the endogenous antibody response to heterologous challenge**

**Laura P. van Lieshout, Amira D. Rghei, Wenguang Cao, Shihua He, Geoff Soule, Wenjun Zhu, Sylvia P. Thomas, Debra Sorensen, Kathy Frost, Kevin Tierney, Brad Thompson, Stephanie Booth, David Safronetz, Raveendra R. Kulkarni, Byram W. Bridle, Xiangguo Qiu, Logan Banadyga, and Sarah K. Wootton**

## Supplementary Figures

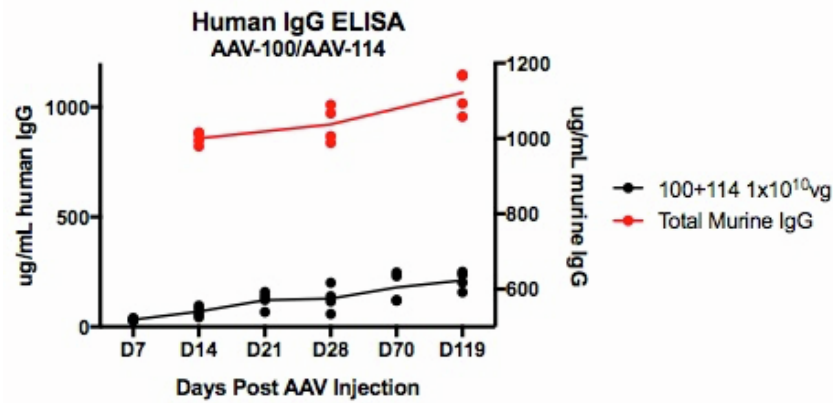

**Figure S1. Comparison of human IgG expression to total murine IgG.** BALB/c female mice (n=4/ group) were injected IM with  $1 \times 10^{10}$  vg of AAV6.2FF-100/114 (equimolar amounts) and human IgG as well as murine IgG was quantified from serum over 17 weeks.

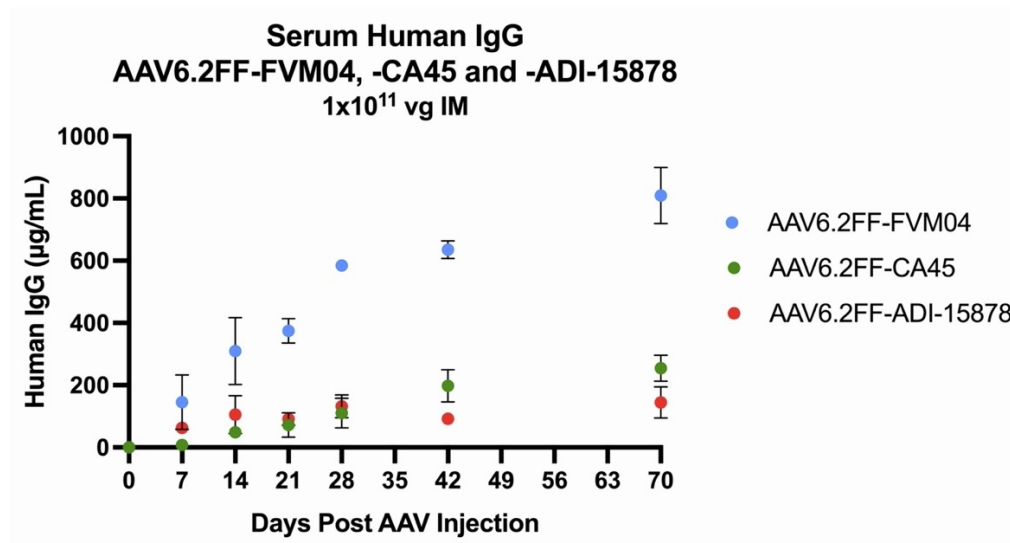

**Figure S2. Serum human IgG concentrations in mice injected intramuscularly with AAV6.2FF vectors expressing mAbs FVM04, CA45, and ADI-15878.** BALB/c female mice (n=4/ group) were injected IM with  $1 \times 10^{11}$  vg of either AAV6.2FF-FVM04, AAV6.2FF-CA45, or AAV6.2FF-ADI-15878, and human IgG was quantified from serum for 10 weeks. The mean and SD are shown.

### Neutralization of EBOV pseudotyped VSV

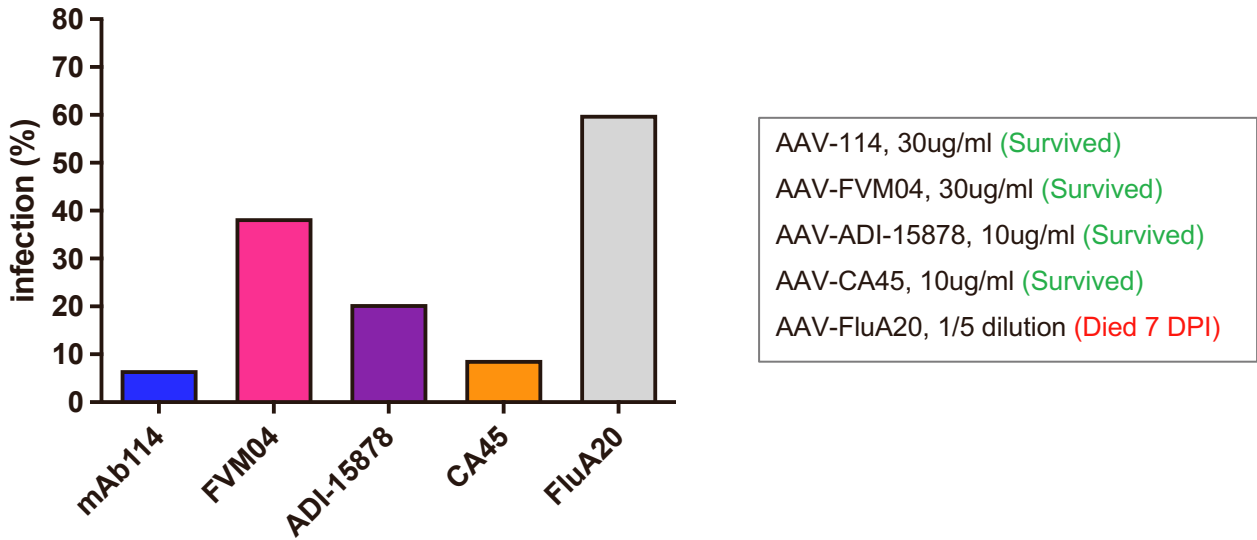

**Figure S3. Neutralizing activity of serum harvested from mice that were transduced with AAV-mAbs and survived MA-EBOV challenge.** We performed virus neutralizing assays using EBOV GP pseudotyped VSV and the limited serum available from mice that received AAV-mAbs mAb114, FVM04, ADI-15878 and CA45 and survived MA-EBOV challenge. Serum from the mouse that was treated with the control AAV showed ~60% infection, meaning that it inhibited infection by about 40%. This is considered background neutralization attributable to non-specific factors in the serum. Note that the comparison between the control AAV and the experimental AAVs is imperfect, since the volume of sample changed depending on the concentration of IgG. AAV-114, AAV-15878, and AAV-CA45 are clearly producing neutralizing antibody. AAV-FVM04 does seem to show some neutralizing activity, although it is minimal compared to what one would expect based on the survival curves. In general, these data support the notion that the quantity of mAb in the serum is the best correlate of protection.

**Table S1. IC50 values for the human mAbs expressed from AAV6.2FF**

| Monoclonal Antibody       | IC50                                                                                                                                                                                                                                                                          | Reference                               |
|---------------------------|-------------------------------------------------------------------------------------------------------------------------------------------------------------------------------------------------------------------------------------------------------------------------------|-----------------------------------------|
| 5D2                       | IC50 not available; however, efficacy in mice and guinea pigs has been tested.<br><u>Mice:</u><br>100 µg given -1 dpi = 87% survival<br>100 µg given +1 dpi = 100% survival<br>12.5 µg given +1 dpi = 100% survival<br><u>Guinea Pigs:</u><br>5 mg given +1 dpi = 0% survival | PLoS Negl Trop Dis 2012; 6(3): e1575    |
| 2G4                       | IC50 not available; however, efficacy in mice and guinea pigs has been tested.<br><u>Mice:</u><br>100 µg given -1 dpi = 7% survival<br>100 µg given +1 dpi = 60% survival<br><u>Guinea Pigs:</u><br>5 mg given +1 dpi = 60% survival                                          | PLoS Negl Trop Dis 2012; 6(3): e1575    |
| mAb100                    | 0.461 nM (0.06 ug/ml)                                                                                                                                                                                                                                                         | <i>Science</i> 2016; 351(6279): 1339-42 |
| mAb114                    | 0.692 nM (0.09 ug/ml)                                                                                                                                                                                                                                                         | <i>Science</i> 2016; 351(6279): 1339-42 |
| FVM04                     | 0.385 nM (0.05 ug/ml)                                                                                                                                                                                                                                                         | <i>J Virol</i> 2016; 90(1): 279-91      |
| ADI-15878                 | ≤ 1 nM                                                                                                                                                                                                                                                                        | <i>Cell</i> 2017; 169(5): 878-890.e15   |
| CA45                      | 1.4-0.6 nM                                                                                                                                                                                                                                                                    | <i>Cell</i> 2017; 169(5): 891-904.e15   |
| *dpi = day post-infection |                                                                                                                                                                                                                                                                               |                                         |

**Table S2. AAV vector doses used in this study reported as vector genomes per kg (vg/kg)**

| AAV vector genomes (vg) administered | Conversion to vg/kg         |
|--------------------------------------|-----------------------------|
| 4x10 <sup>11</sup> vg                | 2x10 <sup>13</sup> vg/kg    |
| 1x10 <sup>11</sup> vg                | 5x10 <sup>12</sup> vg/kg    |
| 5x10 <sup>10</sup> vg                | 2.5x10 <sup>12</sup> vg/kg  |
| 2.5x10 <sup>10</sup> vg              | 1.25x10 <sup>12</sup> vg/kg |
| 1x10 <sup>10</sup> vg                | 5x10 <sup>11</sup> vg/kg    |
| 8x10 <sup>9</sup> vg                 | 4x10 <sup>11</sup> vg/kg    |
| 5x10 <sup>9</sup> vg                 | 2.5x10 <sup>11</sup> vg/kg  |
